# Supplementary material for: Real-World Treatment Patterns according to Clinical Practice Guidelines in Patients with Type 2 Diabetes Mellitus and Established Cardiovascular Disease in Korea: Multicenter, Retrospective, Observational Study
Source: PubMed Central journal article supplement — Diabetes Metab J. 2024 Jan 26;48(2):279–89. doi: 10.4093/dmj.2023.0225 (PMC10995487; doi:10.4093/dmj.2023.0225), 2024-01-26
Supplement: dmj-2023-0225-Supplementary-Fig-1.pdf [file dmj-2023-0225-Supplementary-Fig-1.pdf]

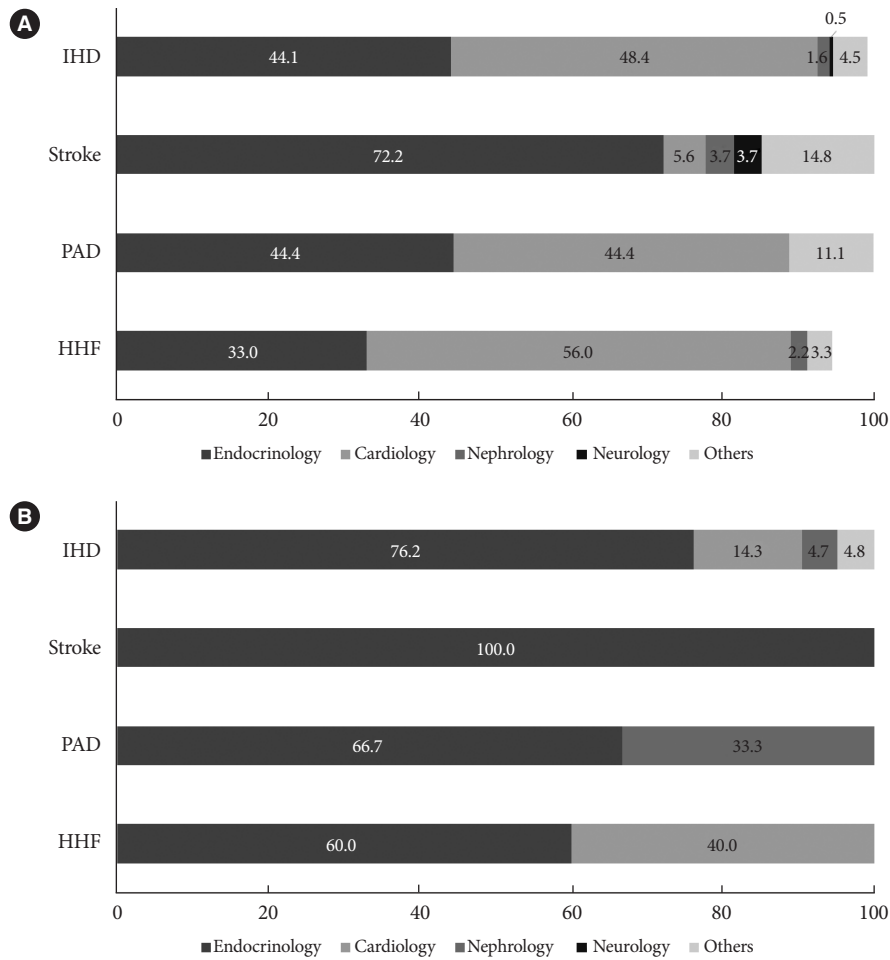

**Supplementary Fig. 1.** Distribution of department prescribing (A) sodium-glucose cotransporter 2 inhibitor and (B) glucagon-like peptide 1 receptor agonist according to the cause of established cardiovascular disease events. IHD, ischemic heart disease; PAD, peripheral artery disease; HHF, hospitalization for heart failure.
