# Supplementary material for: Real-World Treatment Patterns according to Clinical Practice Guidelines in Patients with Type 2 Diabetes Mellitus and Established Cardiovascular Disease in Korea: Multicenter, Retrospective, Observational Study
Source: PubMed Central journal article supplement — Diabetes Metab J. 2024 Jan 26;48(2):279–89. doi: 10.4093/dmj.2023.0225 (PMC10995487; doi:10.4093/dmj.2023.0225), 2024-01-26
Supplement: dmj-2023-0225-Supplementary-Table-1.pdf [file dmj-2023-0225-Supplementary-Table-1.pdf]

**Supplementary Table 1.** Baseline characteristics at event in patients with type 2 diabetes mellitus and established cardiovascular disease

| Variable                         | Value        |
|----------------------------------|--------------|
| Age, yr                          | 70.0±11.9    |
| Male sex                         | 1,371 (66.9) |
| BMI, kg/m <sup>2</sup>           | 24.7±4.1     |
| Smoking                          |              |
| Non-smoker                       | 1,178 (57.5) |
| Former smoker                    | 411 (20.0)   |
| Current smoker                   | 426 (20.8)   |
| Comorbidities                    |              |
| Hypertension                     | 1,522 (74.2) |
| History of IHD                   | 690 (33.7)   |
| History of stroke                | 304 (14.8)   |
| History of PAD                   | 89 (4.3)     |
| History of HF                    | 234 (11.4)   |
| Diabetes duration, yr            | 12.0±10.1    |
| Range of diabetes duration, yr   |              |
| <10                              | 674 (32.9)   |
| 10–19                            | 481 (23.5)   |
| ≥20                              | 452 (22.0)   |
| Unknown                          | 443 (21.6)   |
| SBP, mm Hg                       | 127.3±17.8   |
| DBP, mm Hg                       | 73.2±11.1    |
| Random plasma glucose, mg/dL     | 172.5±78.2   |
| HbA1c, %                         | 7.5±1.6      |
| Creatinine, mg/dL                | 1.40±1.53    |
| eGFR, mL/min/1.73 m <sup>2</sup> |              |
| ≥60                              | 1,311 (64.0) |
| 45–59                            | 304 (14.8)   |
| 30–44                            | 189 (9.2)    |
| <30                              | 234 (11.4)   |
| Total cholesterol, mg/dL         | 150.0±46.7   |
| Triglycerides, mg/dL             | 146.5±117.5  |
| HDL-C level, mg/dL               | 42.8±11.8    |
| LDL-C level, mg/dL               | 86.7±36.1    |

Values are presented as number (%) or mean ± standard deviation. BMI, body mass index; IHD, ischemic heart disease; PAD, peripheral artery disease; HF, heart failure; SBP, systolic blood pressure; DBP, diastolic blood pressure; HbA1c, glycosylated hemoglobin; eGFR, estimated glomerular filtration rate; HDL-C, high-density lipoprotein cholesterol; LDL-C, low-density lipoprotein cholesterol.
